# Supplementary material for: Oxidative coupling of aniline and desulfurization over nitrogen rich mesoporous carbon
Source: Royal Society of Chemistry journal article supplement (doi:10.1039/c5cy00484e), 2015-01-01
Supplement: c5cy00484e1.pdf [file c5cy00484e1.pdf]

## Oxidative coupling of aniline and desulphurization over nitrogen rich mesoporous carbon

Reena Goyal,<sup>a</sup> Deepa Dumbre,<sup>b</sup> L. N. Sivakumar Konathala,<sup>a</sup> Monica Pandey,<sup>a</sup> and Ankur Bordoloi\*<sup>a</sup>

Figure S1

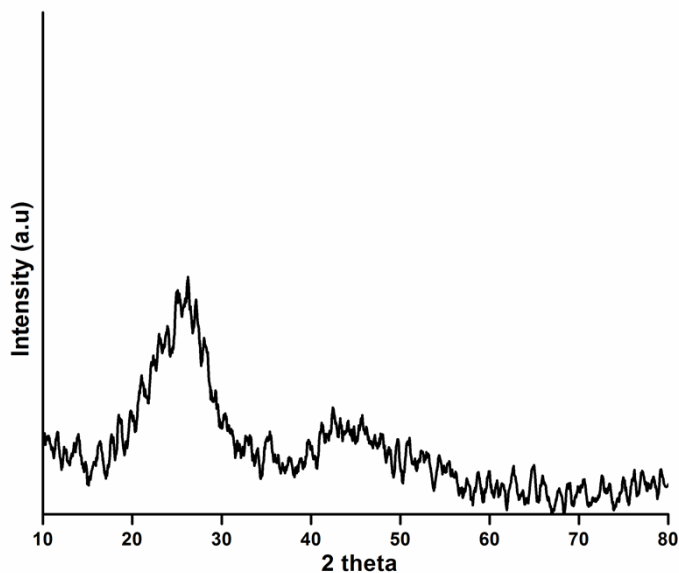

Figure S1 Wide angle XRD of WO<sub>x</sub>/MCN<sub>x</sub> (5).

Figure S2

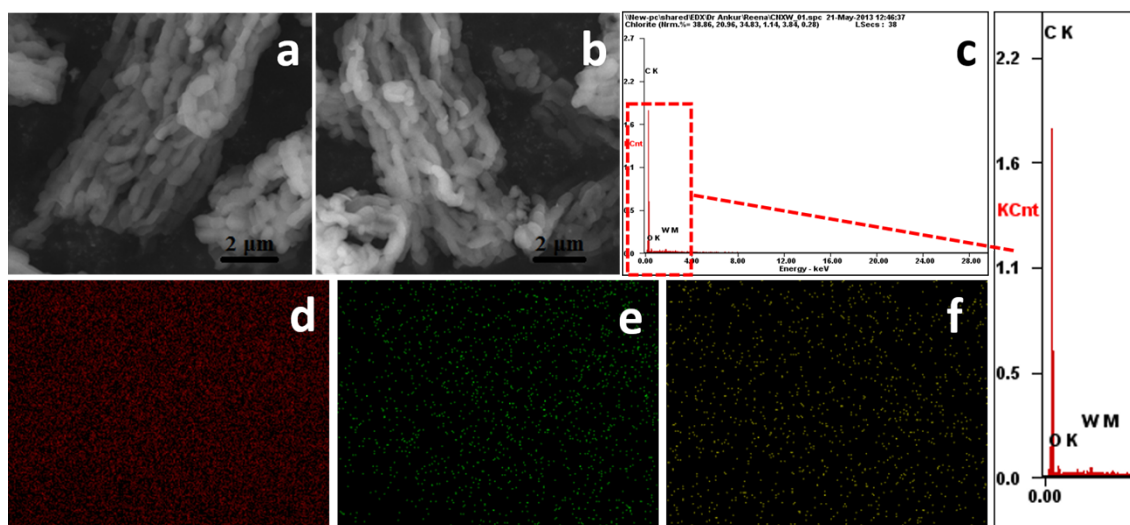

Figure S2. (a-b) SEM images WO<sub>x</sub>/MCN<sub>x</sub>; (c) EDAX analysis of the WO<sub>x</sub>/MCN<sub>x</sub> catalyst and (d-f) is the elemental mapping of carbon, nitrogen and tungsten respectively.

Figure S3

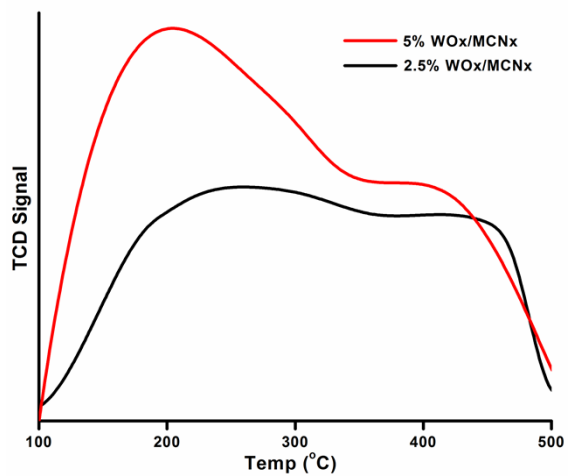

Figure S3. TPD pattern of WOx/MCNx (2.5 & 5).

Figure S4

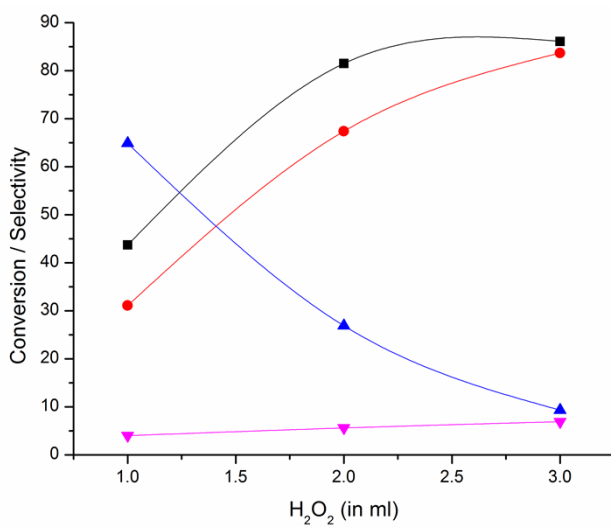

Figure S4. Effect of H<sub>2</sub>O<sub>2</sub> as a function aniline conversion and product selectivity. (■) conversion of DBT; (●) selectivity of azo-benzene; (▲) selectivity of nitroso-benzene and (▼) selectivity of azoxy-benzene.

Figure S5

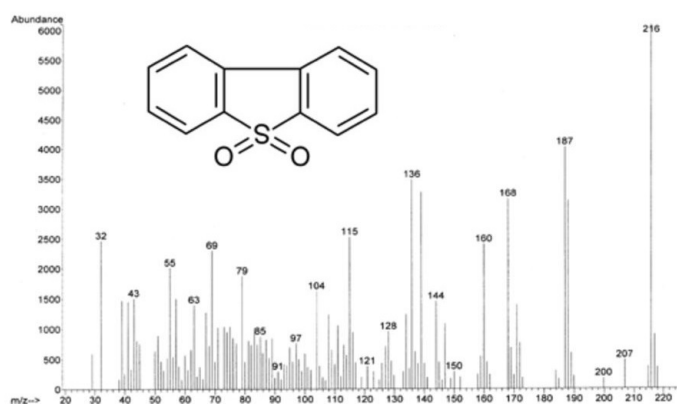

Figure S5. GC-MS of DBTSO (screen shot).

Figure S6

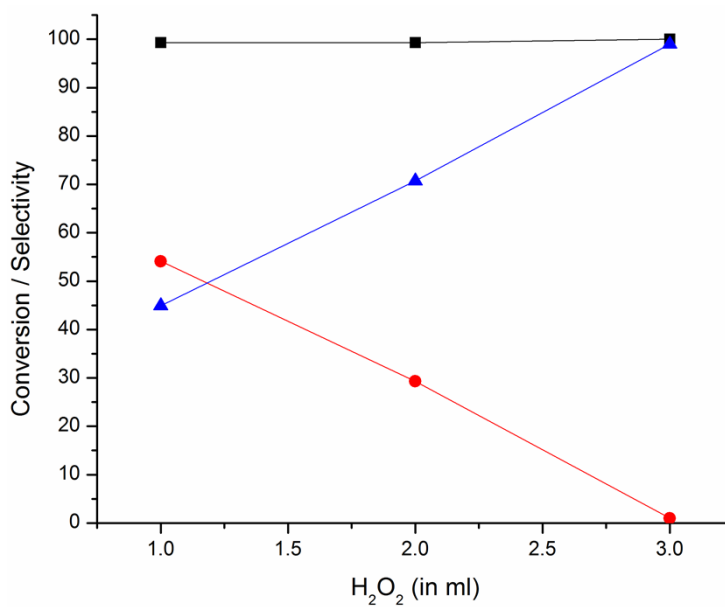

Figure S6. Effect of H<sub>2</sub>O<sub>2</sub> as a function of DBT conversion and product selectivity after 2h time-on-steam. (■) conversion of DBT; (●) selectivity of DBTS and (▲) selectivity of DBTSO.

**Table S1****Table S1.** Physico-chemical parameters of WO<sub>x</sub>/MNC<sub>x</sub>

| Catalyst                                 | $X_{\text{BET}}$<br>(m <sup>2</sup> /g) | $X_{\text{p}}$<br>(cc/g) | $X_{\text{pd}}$<br>(nm) | ICP    | CHN [a] |       | XPS [a] |       |
|------------------------------------------|-----------------------------------------|--------------------------|-------------------------|--------|---------|-------|---------|-------|
|                                          |                                         |                          |                         |        | C       | N     | C       | N     |
| MNC <sub>x</sub>                         | 357                                     | 0.61                     | 3.8                     | -      | 62.7    | 13.38 | 65.8    | 14.02 |
| WO <sub>x</sub> /MNC <sub>x</sub><br>(5) | 327                                     | 0.36                     | 3.5                     | 262.50 | 61.4    | 14.7  | 64.1    | 12.05 |

$X_{\text{BET}}$  = BET surface area in m<sup>2</sup>/g;  $X_{\text{p}}$ = pore volume in cc/g;  $X_{\text{pd}}$ = pore diameter in nm; ICP is in (W/ppm); [a] in mole %.

Scheme S1

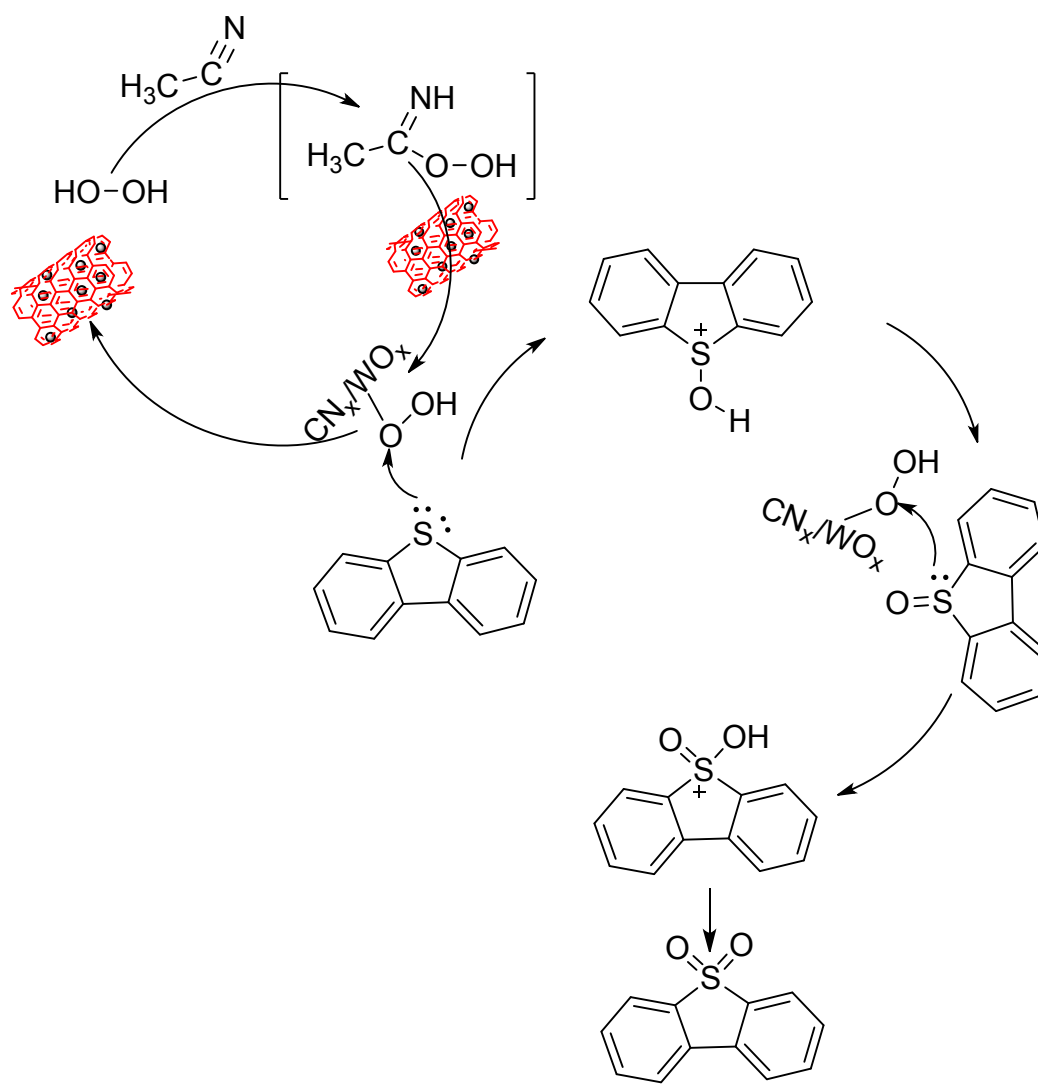

Scheme S1 Plausible reaction pathway for Oxidative desulphurisation of Dibenzothiophene over  $WO_x/MCN_x$ .
